# Supplementary material for: Epigenetic Age Acceleration and Disparities in Posttraumatic Stress in Women in Southeast Louisiana: NIMHD Social Epigenomics Program
Source: PubMed Central journal article supplement (PMC11287391; doi:10.1001/jamanetworkopen.2024.21884), 2024-07-29

## Supplemental Online Content

Smith AK, Katrinli S, Cobb DO, et al. Epigenetic age acceleration and disparities in posttraumatic stress in women in southeast Louisiana: NIMHD Social Epigenomics Program. *JAMA Netw Open*. 2024;7(7.2):e2421884. doi:10.1001/jamanetworkopen.2024.21884

**eFigure 1.** Study Flow Diagram

**eFigure 2.** Directed Acyclic Graph (DAG) Depicting the Associations Between the Epigenetic Age Acceleration (EAA) and PTSD

This supplemental material has been provided by the authors to give readers additional information about their work.

**eFigure 1. Study Flow Diagram**

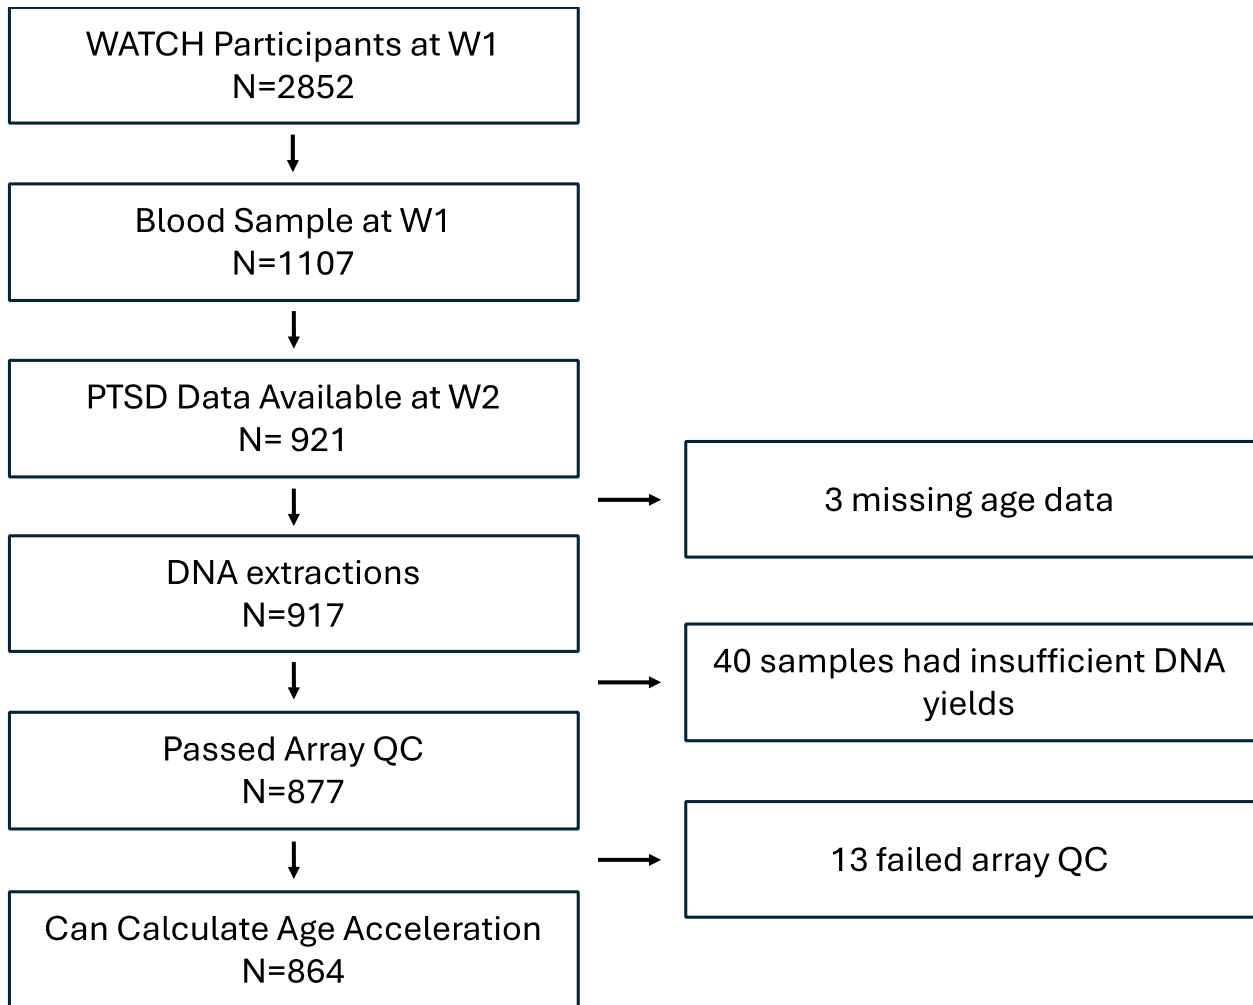

**eFigure 2. Directed Acyclic Graph (DAG) Depicting the Associations Between the Epigenetic Age Acceleration (EAA) and PTSD.** Green lines indicate causal or mediating paths. Pink lines indicate confounding paths. The minimally sufficient adjustment set (MSAS) for direct effect of EAA on PTSD = Race + Tobacco Use + BMI + Income. Generated with daggity.net.

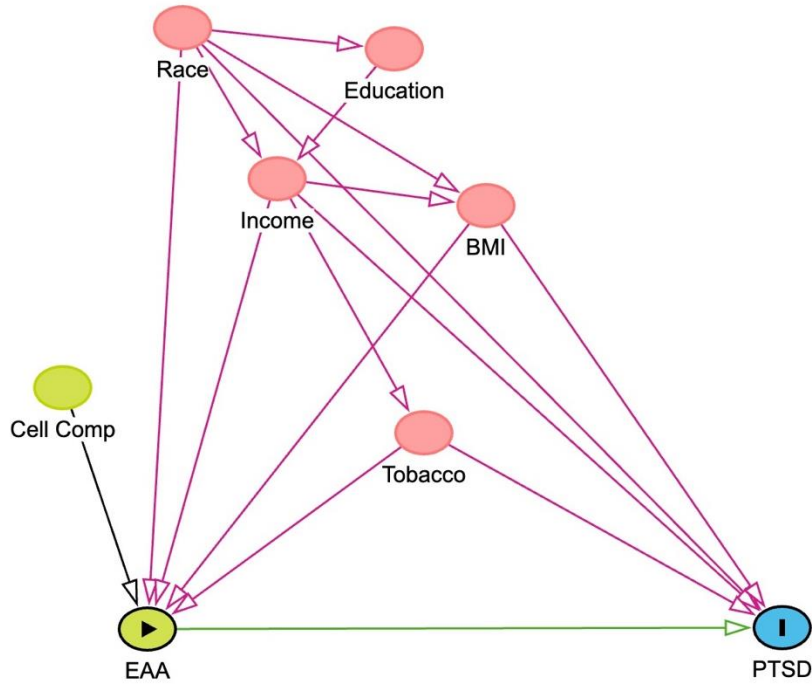

Supplement: jamanetwopen-e2421884-s001.pdf [file jamanetwopen-e2421884-s001.pdf]
