# Supplementary material for: Epigenetic Age Acceleration and Disparities in Posttraumatic Stress in Women in Southeast Louisiana: NIMHD Social Epigenomics Program
Source: PubMed Central journal article supplement (PMC11287391; doi:10.1001/jamanetworkopen.2024.21884), 2024-07-29
Supplement: jamanetwopen-e2421884-s002.pdf [file jamanetwopen-e2421884-s002.pdf]

## Data Sharing Statement

Smith. Epigenetic Age Acceleration and Disparities in Posttraumatic Stress in Women in Southeast Louisiana. *JAMA Netw Open*. Published July 29, 2024.

doi:10.1001/jamanetworkopen.2024.21884

### Data

**Data available:** Yes

**Data types:** Deidentified participant data, Data dictionary

**How to access data:** For access to the WaTCH data, including the data used in this paper, contact the study PI, Dr. Edward Peters at [epeters@unmc.edu](mailto:epeters@unmc.edu).

**When available:** With publication

### Supporting Documents

**Document types:** None

### Additional Information

**Who can access the data:** Researchers whose proposed use of the data has been approved by the study PI.

**Types of analyses:** Approved secondary analyses.

**Mechanisms of data availability:** Data will be made available after approval of a proposal, which may include a collaboration agreement.
